# Supplementary material for: Influence of climate change, land use land cover, population and industries on the pollution of Ganga River
Source: Copernicus journal article supplement (doi:10.5194/egusphere-2022-796), 2022-09-26
Supplement: Supplementary file [file egusphere-2022-796-RC2-supplement.pdf]

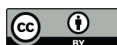

# **Influence of climate change, land use land cover, population and industries on the pollution of Ganga River**

SnehaSanty<sup>1</sup>, Pradeep Mujumdar<sup>1,2</sup> and Govindasamy Bala<sup>1,3</sup>

<sup>1</sup>Interdisciplinary Centre for Water Research, Indian Institute of Science, Bangalore, India

<sup>2</sup>Civil Engineering, Indian Institute of Science, Bangalore, India

<sup>3</sup>Centre for Atmospheric and Oceanic Sciences, Indian Institute of Science, Bangalore, India

## **\*Correspondence:**

Sneha Santy, Interdisciplinary Centre for Water Research, Indian Institute of Science, Bangalore 560 012, India. E-mail: snehasanty@iisc.ac.in

## **Abstract**

Climate change, land use land cover (LULC), population, industries, and sewage treatment are factors that can strongly influence river water quality. This paper uses a coupled hydrological-water quality simulation model to assess the influence of each of these drivers on the most polluted river stretch of the Ganga River. The water quality model QUAL2K is driven by these five factors to assess their influence on nine water quality parameters, namely dissolved oxygen (DO), biochemical oxygen demand (BOD), faecal coliform, ammonia, nitrate, total nitrogen, organic-, inorganic-, and total phosphorous. Climate change projections are taken from CMIP5 RCP 4.5 and RCP 8.5 scenarios. Five socio-environmental scenarios which consider sewer network, sewage treatment capacity, level of treatment at sewage treatment plants (STPs), and the type of sewage (domestic or mixed) are also considered. The water quality is simulated using a coupled HEC-HMS-QUAL2K framework. The non-point source pollution is quantified using the export coefficient method, where the export of pollutants from all land use classes are considered. The climate change effect is found to have a larger effect on Kanpur water quality than other drivers, with a percentage contribution of above 70% because of the large sensitivity of water quality parameters to the amount of streamflow. Climate change projections combined with socio-environmental scenarios imply that the large increase in pollution due to climate change, LULC, industry, and population growth cannot be controlled by the current treatment proposals for 2050. However, providing adequate STPs to meet the population of 2050, and allowing only domestic sewage to reach STPs can help to achieve the objective of the Ganga Action Plan in the mid-21st century.

**Keywords:** Climate change, land use, industry, population, Ganga pollution, water quality

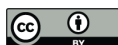

## 33 1. Introduction

34 Water pollution of rivers is one of the crucial environmental issues, especially for developing  
35 countries like India. However, proper management can save our rivers from future pollution  
36 (Shukla et al., 2018). For this to happen, it is important to understand the sensitivity of water  
37 quality parameters to major drivers that cause pollution. This knowledge can help water system  
38 designers and policy makers take appropriate measures while designing a treatment unit or  
39 changing policies for industrial dischargers. The major drivers that can affect the river water  
40 quality in the future are climate change, land use land cover changes, population and industrial  
41 growth, and the amount of treatment given to wastewater (Hunter, 2003).

42 In India, the Ganga River has high religious importance, and it serves a large population in  
43 many ways, such as, irrigation, industrial and domestic use and hydropower generation. Ganga  
44 Action Plan (GAP) was launched in 1986 to achieve 'bathing class' standard by 2000  
45 (Environment & Forests Division and Water Resources Division Planning Commission  
46 Government of India, 2009). Though there has been a significant improvement in Ganga water  
47 quality since 2006 (Central Pollution Control Board, 2013), the goal of GAP is not fulfilled,  
48 particularly at the pollution hotspot of Kanpur (Central Pollution Control Board, 2013). A study  
49 conducted by seven Indian Institute of Technology (IIT) in 2011 suggested that there should be  
50 an Urban River Management Plan that focuses on how sewage should be treated and conveyed  
51 (Indian Institutes of Technology, 2010a). It also proposed to construct sewage treatment plants  
52 (STP) for the present load and later increase the capacity to meet the demand from population  
53 increase. Further, it suggested to enhance the level of treatment at STPs to tertiary level as the  
54 present treatment is not effective in treating microbial load, and to increase sewer connectivity  
55 to STPs (Indian Institutes of Technology, 2010b; Indian Institutes of Technology, 2011; Indian  
56 Institutes of Technology, 2012). In this context, it is also important to isolate the effects of  
57 major drivers on water quality.

58 Climate change is an important driver which can aggravate water pollution. Even if municipal  
59 or industrial discharges remain the same in the future, climate change can alter flow  
60 characteristics and temperature, affecting the dilution factor, reaction kinetics, and water  
61 pollution (Rehana and Mujumdar, 2012). Climate change impact studies on the Ganga River  
62 show a reduction in water availability, water quality, and ecological degradation if no actions  
63 are taken in the future (Bons, 2018; Santy et al., 2020; Santy et al., 2022). In recent studies on  
64 the Ganga River basin using a process-based Integrated Catchment (INCA) model (Jin, 2015;

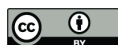

65 Whitehead et al., 2015; Whitehead et al., 2018; Whitehead, 2018), ammonia, nitrate, and  
 66 phosphorous concentration are projected to decrease in the SRES A1B scenarios.

67 Land use land cover also play an important role in water quality, with high nutrient  
 68 concentration associated with agricultural land; high BOD, COD, and suspended solid  
 69 associated with urban land; and improved water quality associated with forestland (Santy et  
 70 al., 2020; Permatasari et al., 2017; Davids et al., 2018; Jacobs et al., 2018; Namugizea et al.,  
 71 2018; Gyawali et al., 2013). A growing population could result in increased water demand and  
 72 municipal sewage generation, which will aggravate the pollution of rivers (Khattiyavong and  
 73 Lee, 2019). Further, socio-economic factors, such as agricultural, industrial, and domestic  
 74 demands, sewage treatment capacity, and effluent characteristics, also influence the Ganga  
 75 basin water quality (Bons, 2018; Whitehead et al., 2015).

76 Wastewater treatment plants (WWTP) are meant to reduce river pollution by reducing the  
 77 pollutant concentration of sewage. However, the effluents of WWTP should be well within  
 78 limits, otherwise the effluents can cause pollution (Pascual-Benito et al., 2020). Past studies on  
 79 the effluent discharge of pharmaceutical industries to the rivers show the importance of WWTP  
 80 as it can help to improve the quality of water downstream. Partial removal of pollutants can  
 81 lead to having residues in the drinking water (Al-Ahmad et al., 1999; Hernando et al., 2006;  
 82 Choi et al., 2008). The inflow rate is identified as the most crucial operational factor of a  
 83 wastewater treatment plant in a study in the UK (Astarai-Imani et al., 2012). Climate change  
 84 can impact the inflow rate and the treatment processes due to hydrologic variation, increase in  
 85 water temperature, increase in organic load, and variation in chemical and pathogenic load  
 86 (Hurst et al., 2004; Rosario-Ortiz et al., 2007).

87 The isolated and combined impact of climate change and land use on Ganga river water quality  
 88 is analysed in Santy et al., (2020) using hypothetical scenarios and a standalone water quality  
 89 simulation model. That work dealt with **sensitivity of water quality parameters to climatic and**  
 90 **land use forcings**, using hypothetical scenarios; however, more realistic climate and land use  
 91 projections are to be considered for an accurate quantification of isolated effects. In the  
 92 subsequent study (Santy et al., 2022), the isolated risk of low water quality, eutrophication and  
 93 fish kill with climate change is quantified for the 2040-60 and 2080-2100 periods. Santy et al.,  
 94 (2022) use climate projections of CMIP5 RCP 4.5 & RCP 8.5 scenarios and **a coupled**  
 95 **hydrological-water quality simulation model for the analysis**. However, the effects of major  
 96 factors such as land use projections, population and industrial growth are not considered in that

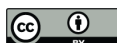

197 study. The work presented in this paper advances the earlier work by explicitly accounting for  
198 anthropogenic forcings such as land use, population and industrial growth along with climate  
199 change and their isolated effects on water quality. The percentage contribution of these factors  
200 to water pollution is quantified, and the predominant factor is identified. Planners and designers  
201 consider only population growth for the future while designing a treatment unit, which can  
202 underestimate future pollution levels as factors such as climate change, land use land cover and  
203 industrial growth would affect water quality. Hence, it is essential to study whether the  
204 proposed treatment can cater to the additional load due to these anthropogenic factors. The  
205 objectives of this paper are to (i) isolate the effects of climate change, land use land cover  
206 change, population and industrial growth on water quality, and (ii) to assess whether the  
207 proposed treatment for Kanpur in the mid-21st century is sufficient to achieve the objective of  
208 GAP.

209 The CMIP5 climate change projections for 20 GCMs along with land use projections, industry  
210 and population growth are used to drive a coupled hydrological-water quality simulation model  
211 to simulate nine water quality parameters: dissolved oxygen (DO), biochemical oxygen  
212 demand (BOD), faecal coliform (FC), ammonia, nitrate, total nitrogen (TN), organic-,  
213 inorganic- and total phosphorous (TP). The comparison of CMIP5 and CMIP6 climate outputs  
214 shows that the multi model ensemble means of both give similar values, and CMIP6 is not  
215 found to outperform the CMIP5 dataset (Bourdeau-Goulet and Hassanzadeh, 2021; Li et al.,  
216 2021). The export coefficient method is used to estimate the non-point source pollution from  
217 each land use class. Water quality is also analyzed for five socio-environmental scenarios  
218 where proposed sewage treatment capacities, level of treatment at STP: secondary and tertiary,  
219 and type of sewage reaching STP: domestic and mixed is considered. The novelty of the study  
220 lies in isolating the effects of the major drivers: climate change, land use land cover, population  
221 and industrial growth on water quality in terms of nine water quality parameters and identifying  
222 the most crucial driver for the most polluted Kanpur stretch of the Ganga River. This will help  
223 decision-makers decide in the design of treatment units to ensure water quality.

## 224 2. Methodology

### 225 2.1 Study Area

226 <sup>the</sup> Ganga river supports one of the highest density of population in the world (Central Water  
227 Commission & National Remote Sensing Centre, 2014), stretching across northern India and  
228 Bangladesh. The river has a catchment area of 8,61,404 sq. km and a length of 2525km in India.

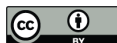

the Ganga River, the largest river basin in India, lies between 73°2'E to 89°5'E longitudes and 21°6'N to 31°21'N latitudes. The types of industries discharging to the Ganga River are Tannery, sugar & distillery, pulp and paper mills with high pollution load of BOD, Chemical oxygen demand (COD), solids, TN, chromium, sulphate, sulphide and chloride.

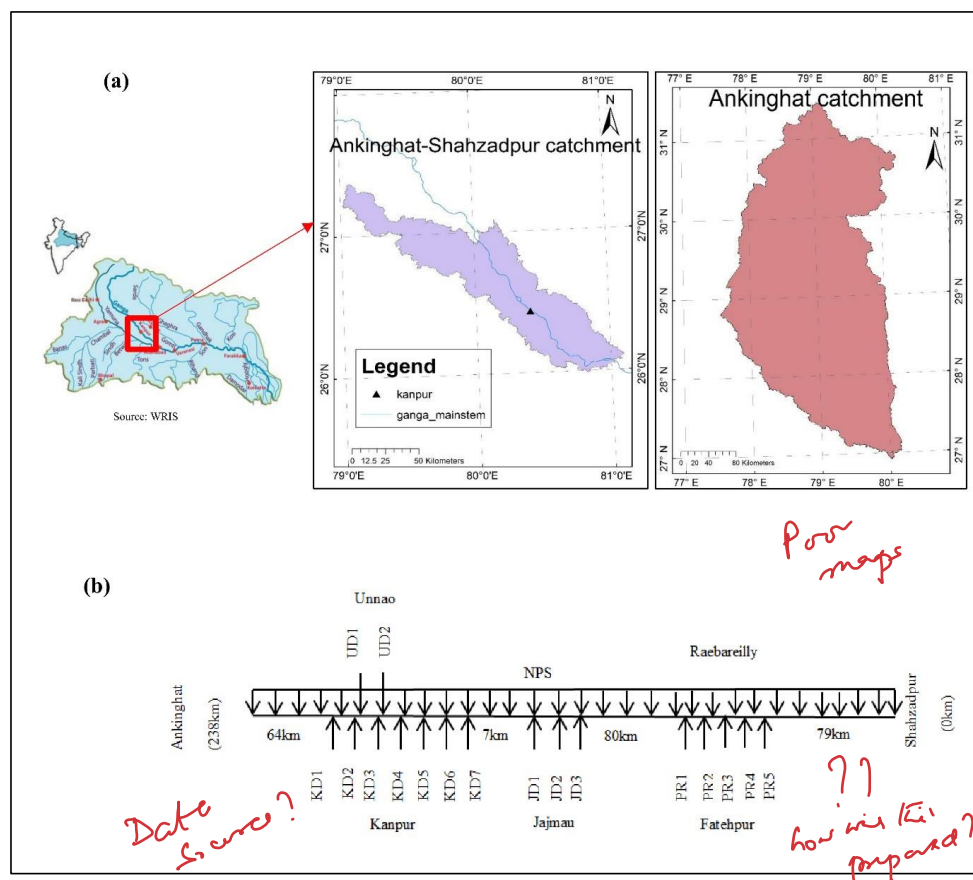

Figure 1: (a) Ganga basin with study area Ankinghat to Shahzadpur river stretch and Ankinghat catchment highlighted in two boxes; (b) Schematic diagram of the river stretch with point and non-point loads joining.

A 238 km long stretch of Ganga River from Ankinghat to Shahzadpur is considered in the present study. Figure 1 shows the study area with point loads and diffuse loads. The prominent locations where the drains carrying domestic and industrial sewage join are Kanpur, Jajmau, Unnao, and Fatehpur. The effluent characteristics of each drain (Supplementary Table S1) consist mainly of BOD, ammonia, nitrate, faecal coliform and phosphorous loading. The major



142 industries contributing to Kanpur, Unnao and Jajmau drains are Tannery and slaughterhouse  
 143 (Supplementary Table S2).

144 The Ranighat drain (KD1), Sisamau Nala (KD2), Bhagwatdas Nala (KD3), Golaghat Nala  
 145 (KD4), Satti chaura (KD5), Permiya drain (KD6) and Muir mill drain (KD7) join Ganga river  
 146 at Kanpur with high ammonia and faecal coliform loading and low nitrate loading. The Loni  
 147 drain (UD1) and City Jail drain (UD2) join Unnao with high BOD and faecal coliform loading.  
 148 The Shetla Bazar (JD1), Wazidpur drain (JD2), and Bhurighat drain (JD3) join at Jajmau with  
 149 high BOD, ammonia, nitrate, phosphorous and faecal coliform loading. The Panki Thermal  
 150 Power Plant drain (PD1), ICI drain (PD2), Ganda Nalla (PD3), COD nalla (PD4) and Halwa  
 151 Khanda Nalla (PD5) join Pandu river with high BOD, ammonia and faecal coliform loading  
 152 and moderate nitrate loading. The data used for the study is given in Supplementary Table S3.

## 153 **2.2 Methodology**

154 A schematic diagram of an overview of the work is given in Figure 2. To obtain the individual  
 155 effect of climate change, land use, land cover, population and industry, coupled hydrological  
 156 and water quality simulations are performed by changing only one driver at a time in a  
 157 simulation, keeping other drivers unchanged in the future. An ensemble of statistically  
 158 downscaled air temperature and precipitation projections from 20 GCMs (Supplementary  
 159 Table S4) for the mid-21st century for two climate change scenarios, RCP 4.5 and RCP 8.5, is  
 160 considered for climate change projections. The projected LULC for 2040 (Both cropland and  
 161 built-up land are allowed to change) with a good kappa index of agreement from Chawla and  
 162 Mujumdar, 2018 for the Upper Ganga basin is used for the present study. The population  
 163 projections of the drain catchment area are calculated from the projected population of India  
 164 (United Nations, 2019) for the mid-century using the Ratio and Correlation method of  
 165 Population forecast (Martin & Serow, 1978) where the population growth rate of the city is  
 166 assumed to be the same as the population growth rate of entire India. The industrial load is  
 167 increased by 10%, 20% and 30% to analyze the effect of industries on water quality. Assuming  
 168 a fixed increase in the number of industrial areas per 100,000 population for Kanpur (Indian  
 169 Institute of Technology, 2013), the percentage increase for 2040 projections is approximately  
 170 10%.. Additional information on these drivers is given in Supplementary Text S1. The stream  
 171 flow and water quality are simulated using HEC-HMS model (Supplementary Text S2) and  
 172 QUAL2K model (Supplementary Text S3), respectively.

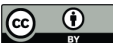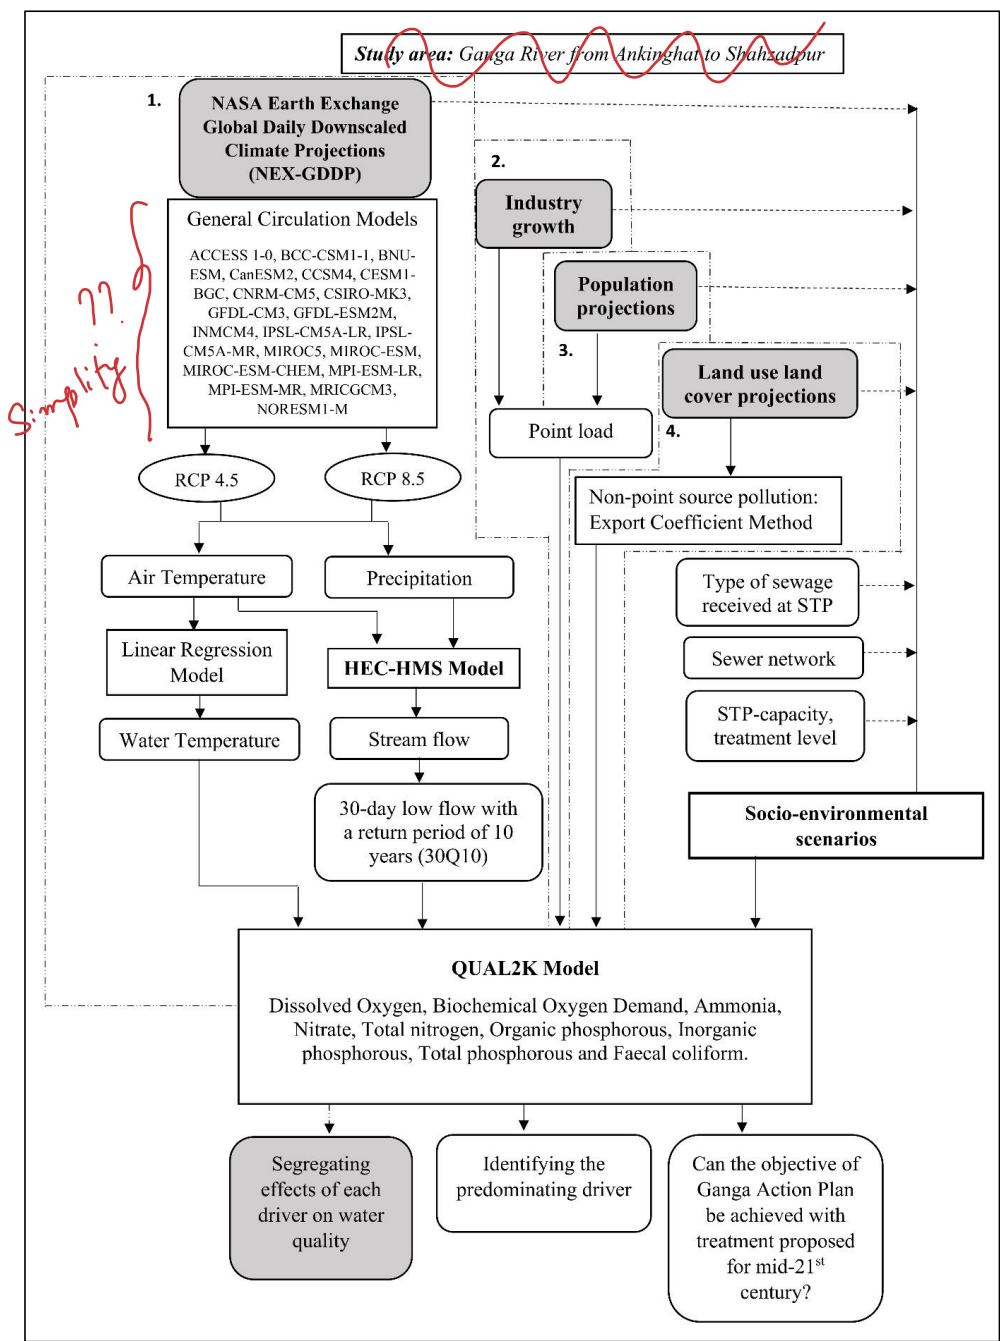

173

174 Figure 2: Overview of work

175





### 176 **2.2.1 Hydrological Model**

177 The Hydrologic Engineering Center, Hydrologic Modeling System (HEC-HMS 4.3) (U. S 133  
 178 Army Corps of Engineers Hydrologic Engineering Center, 2000) is used to simulate the  
 179 streamflow at Ankinghat, the headwater for the water quality simulation. Simple Canopy,  
 180 Simple Surface, SCS curve number method, SCS Unit Hydrograph, Constant Monthly  
 181 Baseflow, and Muskingum are the methods used for modelling the canopy, surface, loss,  
 182 transform, baseflow, and routing, respectively. The model is calibrated for the period 1977-  
 183 2002 and validated for 2003-2012 on a monthly timescale with an  $R^2$  of 0.6 (Supplementary  
 184 Text S2). The model is found to perform well for low flows. The climatic inputs such as  
 185 precipitation, average temperature and temperature range are changed with RCP 4.5 and 8.5,  
 186 and the curve number is changed with land use land cover projections. The monthly streamflow  
 187 is simulated by the model and the 30Q10 value is calculated (Supplementary Text S4) and  
 188 given as input to the water quality model, QUAL2K. For analyzing the individual contribution  
 189 of each driver, only corresponding inputs are changed while keeping other factors unchanged.

### 190 **2.2.2 Water quality simulation model**

191 The nine water quality parameters assessed are dissolved oxygen, biochemical oxygen demand,  
 192 ammonia, nitrate, total nitrogen, organic-, inorganic- and total phosphorous and faecal  
 193 coliform. These parameters are simulated using the water quality simulation model QUAL2K  
 194 (Chapra and Pelletier, 2003) (Supplementary Text S3). The inputs to the model are stream flow,  
 195 stream temperature, water quality at the headwater, hydro geometric characteristics of the river  
 196 reach such as width, depth, channel slope, side slope, manning's n, meteorological data such as  
 197 air temperature, dew point temperature, wind speed, evaporation, cloud cover; point loads and  
 198 diffuse loads. The diffuse load is calculated using an export coefficient method where export  
 199 from all land-use types is considered (Supplementary Text S5).

200 The point loads include industrial and domestic sewage discharge. The point load projections  
 201 consider the population and industrial growth. The sewage projections are calculated from the  
 202 population projections of each drain's catchment area and are taken as 80% of the water supply,  
 203 135 litres per capita per day. The non-point load changes with land use land cover changes are  
 204 simulated from export coefficients developed for the study area (Santy et al., 2020). The water  
 205 temperature is simulated using the Air-water temperature regression model for Ankinghat  
 206 (Santy et al., 2020), and the 30Q10 value of streamflow from the 2040 through 2060 period is  
 207 given as input to the QUAL2K model. The calibrated rate kinetics is changed with changes in



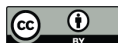

stream temperature (Supplementary Table S5). The water quality is analyzed at five checkpoints: Kanpur downstream, Jajmau downstream (1), Jajmau downstream (2), Fatehpur downstream, and Shahzadpur. The Jajmau downstream (1) and (2) correspond to immediate downstream and 8km downstream of Jajmau, which is identified as the critical location in the DO sag curve. The individual effect of each driver is analyzed using percentage change from baseline and change ratio. Change ratio is calculated as the ratio of change in a water quality parameter for a single driver to cumulative change expressed in percentage.

$$CR_{i,j} = \frac{\Delta C_{i,j}}{\sum_{j=1}^4 \Delta C_{i,j}} \quad (1)$$

Where  $CR_{i,j}$  is the change ratio of  $i^{\text{th}}$  water quality parameter for  $j^{\text{th}}$  driver and  $\Delta C_{i,j}$  is the change in  $i^{\text{th}}$  water quality parameter for  $j^{\text{th}}$  driver from baseline.

### 2.3 Socio-environmental scenarios

Five socio-environmental scenarios (Table 1) are considered based on the proposals made for a cleaner Ganga basin (Indian Institute of Technology, 2010 a, b, c, d; Indian Institute of Technology, 2011; Indian Institute of Technology, 2012). The first scenario is the baseline future scenario, considering climate change, LULC change, and population and industrial growth for the mid-21st century with STPs at present-day levels. From second scenario onwards, we assume that all households would have access to toilets, sewer line connectivity is fully established, and STPs receive total capacity sewage. The proposed and tendered STP works for the future are considered for second scenario (Supplementary Text S6), along with future climate change, LULC, and growth of industries and population. We also assume that the faecal coliform concentration at headwater is within the bathing class limit (500 MPN (100mL)<sup>-1</sup>), and the diffuse load contribution of the faecal load is a minimum as open defecation will be entirely removed from the system.

The third scenario is a planning scenario proposed by the Urban River management plan (Indian Institute of Technology, 2010a, 2010b) for Ganga. Kanpur is the first city to prepare such a plan in 2021, and the major highlights include increasing the STP capacity to meet the present population (2020), and the plan would last for 15 to 25-year duration. Also, the wastewater flowing in the drains is tapped and redirected to STPs, where mixed sewage, including industrial and domestic sewage, reaches the STP. Even if the industries are discharging at effluent standards, it mixes with untreated wastewater before reaching STPs. This leads to a larger increase in the flow of the drains than the population demand, resulting



239 in overflowing or bypassing of untreated sewage reaching the Ganga River. Hence, it is crucial  
240 to study the difference if only domestic sewage reaches STP for treatment. Therefore, one  
241 additional sub-scenario is considered for 3, 4 and 5 with **separate industrial and domestic**  
242 **sewage treatment**. Scenario 4 assumes STP capacity for the 2050 population load is in place.  
243 Scenario 5 is the same as scenario 3 but tertiary level treatment is given at the STPs for proper  
244 microbial removal as proposed by IIT Consortium reports. Scenarios 4 and 5 show how  
245 treatment capacity and level affect water quality, which is more critical to reducing microbial  
246 pollution.

247 Table 2 shows a detailed description and nomenclature of the scenarios. In the scenario name,  
248 'C' refers to climate change, and the number after C describes climate change scenarios, '45' for  
249 RCP 4.5, and '85' for RCP 8.5. This is followed by 'LP' for land use, industry and population  
250 projection. For example, C45LP and C85LP represent the socio-environmental scenario 1 for  
251 climate change scenarios RCP 4.5 and 8.5. The following letter 'S' represents STP, and the  
252 following number denotes the year for which STPs are built to meet the demand: 'S20' and  
253 'S50' indicate that the STP capacity is built to meet the population of 2020 and 2050,  
254 respectively. This is followed by 'S' or 'T', representing the level of treatment given at STPs: S  
255 for secondary and T for tertiary. The letter 'M' or 'D' represents the sewage type received at  
256 STPs: M for mixed sewage and D for domestic sewage.

257

258

259

260

261

262

263

264

265

266

267

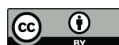

268 Table 1: Description of the five socio-environmental scenarios

| Scenario no | Description                                                           | Details                                                                                                                                                                                                                                                                                            |
|-------------|-----------------------------------------------------------------------|----------------------------------------------------------------------------------------------------------------------------------------------------------------------------------------------------------------------------------------------------------------------------------------------------|
| 1           | Baseline future scenario with STP capacity at present day conditions. | Future Climate, LULC, population, industry for 2050; Point loads of 2018 drain data modified for 2050; present STP working condition                                                                                                                                                               |
| 2           | Includes proposed STPs (Real-time scenario)                           | Future Climate, LULC, population, industry for 2050; Point loads of 2018 drain data modified for 2050; complete sewer lines laid; STP working on total capacity; proposed & tendered STPs also considered; all industries comply with effluent standards; STPs work with secondary level treatment |
| 3           | Increased STP capacity (Planning Scenario)                            | Same as scenario 2, with an increase in STP capacity to meet the population of 2020 as proposed by the Urban River Management Plan for Ganga                                                                                                                                                       |
| 4           | Tertiary treatment at STP                                             | Same as scenario 3, but with tertiary treatment at STPs                                                                                                                                                                                                                                            |
| 5           | Ideal scenario                                                        | Same as scenario 2, but with an increase in STP capacity to meet the population of 2050                                                                                                                                                                                                            |

269

270

271

272

273

274

275

276

277



Table2: Socio-environmental scenarios. 'C' refers to climate change; '45' and '85' for RCP 4.5 & 8.5; 'LP' for land use, industry and population projection; 'S' represents STP, followed by number denoting the year (20 for 2020 and 50 for 2050) for which STPs are built to meet the demand, followed by 'S' or 'T', representing the level of treatment given at STPs (S for secondary and T for tertiary), and followed by 'M' or 'D' representing the sewage type received at STPs: M for mixed sewage and D for domestic sewage.

| Sl no | Scenario name | Climate scenario | LULC                                                  | Population                      | Industry                   | Sewer lines | STP capacity                 | STP treatment level | Sewage type |
|-------|---------------|------------------|-------------------------------------------------------|---------------------------------|----------------------------|-------------|------------------------------|---------------------|-------------|
| 1     | C45LP         | RCP 4.5          | LULC projection for 2040 from Chawla & Mujumdar, 2018 | Population Projections for 2050 | Industrial growth for 2050 | Present     | Present                      | Secondary           | M           |
| 2     | C45LPSPSM     |                  |                                                       |                                 |                            | Fully laid  | Proposed STPs                | Secondary           | M           |
| 3a    | C45LPS20SM    |                  |                                                       |                                 |                            |             | STPs to meet 2020 population | Secondary           | M           |
| 3b    | C45LPS20SD    |                  |                                                       |                                 |                            |             |                              |                     | D           |
| 4     | C45LPS20TM    |                  |                                                       |                                 |                            |             | STPs to meet 2020 population | Tertiary            | M           |
| 4b    | C45LPS20TD    |                  |                                                       |                                 |                            |             |                              |                     | D           |
| 5     | C45LPS50SM    |                  |                                                       |                                 |                            |             | STPs to meet 2050 population | Secondary           | M           |
| 5b    | C45LPS50SD    |                  |                                                       |                                 |                            |             |                              |                     | D           |
| 6     | C85LP         | RCP 8.5          |                                                       |                                 |                            | Present     | Present                      | Secondary           | M           |
| 7     | C85LPSPSM     |                  |                                                       |                                 |                            | Fully laid  | Proposed STPs                | Secondary           | M           |
| 8a    | C85LPS20SM    |                  |                                                       |                                 |                            |             | STPs to meet 2020 population | Secondary           | M           |
| 8b    | C85LPS20SD    |                  |                                                       |                                 |                            |             |                              |                     | D           |
| 9a    | C85LPS20TM    |                  |                                                       |                                 |                            |             | STPs to meet 2020 population | Tertiary            | M           |
| 9b    | C85LPS20TD    |                  |                                                       |                                 |                            |             |                              |                     | D           |
| 10a   | C85LPS50SM    |                  |                                                       |                                 |                            |             | STPs to meet 2050 population | Secondary           | M           |
| 10b   | C85LPS50SD    |                  |                                                       |                                 |                            |             |                              |                     | D           |

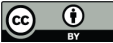

288 **3. Results & Discussion**

289 **3.1 Future projections of drivers**

290 **3.1.1 Climate change projections**

291 The air temperature anomalies for RCP 4.5 and RCP 8.5 show an increase in air temperature  
292 within a range of 1.5 to 2.5 °C for mid of 21st century, with a higher temperature rise in the  
293 RCP 8.5 scenario (Figure 3(a)). The annual precipitation anomaly from the historical period  
294 shows an increase in median annual precipitation for the Ankinghat catchment (Figure 3(b)).  
295 The model-wise air temperature and precipitation projections for climate change show large  
296 variability (Supplementary Figure S1); hence, an ensemble of GCMs is considered for the  
297 analysis. The monthly precipitation increases during the summer monsoon season and  
298 decreases during the pre-monsoon season (Supplementary Figure S1). The increase in air  
299 temperature and the resulting stream temperature (Supplementary Figure S2) and reduction in  
300 summer precipitation (Supplementary Figure S1) can have a negative impact on streamflow,  
301 with more low flow events which can reduce the dilution volume for the pollutant loads.

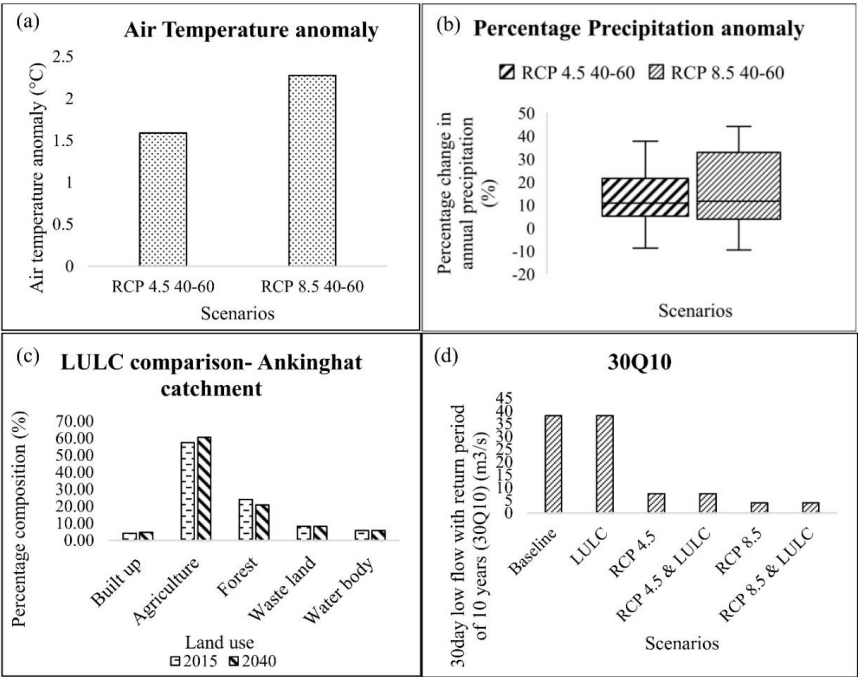

302

303 Figure 3: Climate change and land-use projections (a) Air temperature anomaly and (b)

304 Percentage precipitation anomaly for Ankinghat catchment; (c) Land use land cover percentage

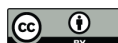

305 composition for Ankinghat catchment for 2015 and 2040; (d) 30-day low flow with a return  
 306 period of 10 years for climate change and land use land cover projections

### 307 **3.1.2 Land use land cover projections**

308 The land use land cover projections for the Ankinghat catchment show an **increase in**  
 309 **agricultural land and built-up land and a reduction in forestland** (Figure 3(c)). The percentage  
 310 composition of the land for the study area in 2015 and 2040 simulated is shown in Fig 4. The  
 311 projected LULC shows an increase in agricultural land and built-up land and a reduction in  
 312 wasteland and forestland for both the stretches. Agricultural land is the predominant land cover  
 313 type for the study area; hence, **non-point source pollution** can have a major effect on water  
 314 quality. An increase in non-point pollution load of up to 10% is simulated for the future LULC  
 315 which can affect mainly the nutrient pollution. Also, increase in agricultural land can affect the  
 316 evapotranspiration and hence affect the streamflow which in turn affects water quality by  
 317 altering the dilution factor (Zou et al., 2017).

### 318 **3.1.3 Population and Industrial projections**

319 The projected population of the mid-century catchment area of the drains along with the present  
 320 population is shown in Fig 5(a), and the sewage generated by the present and future population  
 321 calculated is shown in Fig 5(b). The population projected for mid-century matches with the  
 322 projections made by Kanpur and Unnao city for Planning, which uses the mean of population  
 323 obtained from Arithmetic increase, geometric increase and incremental increase method  
 324 (Ministry of Urban Development et al., 2016, Unnao Nagar Palika Parishad, 2016). A  
 325 population increase is expected in the Kanpur area, where there is much scope for urban  
 326 expansion due to available fertile land for cultivation, and job opportunities due to industrial  
 327 growth for the future. The rise in population can lead to rise in sewage generated and hence  
 328 increase the point loads coming to the drains, especially the faecal coliform. Industrial growth  
 329 is expected in the Kanpur industrial belt, due to availability of raw materials and current efforts  
 330 towards industrialization in Uttar Pradesh to increase economic growth (The Economic Times,  
 331 2021). The industrial growth can lead to high pollution in river if the effluents are not treated  
 332 properly before disposal.

333 The comparison of point loads from drains with population and industry projections are shown  
 334 in Figure 5 (c)-(g). The BOD loads are greatly affected by population and industrial growth,  
 335 with a higher loading corresponding to population growth at all drains. **The effect of industrial**  
 336 **and population growth has significantly affected Unnao and Jajmau BOD loadings.** Unnao



drains did not contribute to ammonia and nitrate loading. The effect of population dominates the effect of industry on ammonia and nitrate loading, except for Jajmau, where both the effects are found comparable. The most significant increase in ammonia and nitrate loading from baseline is observed for Jajmau drains. The only drain which carries P load is the Jammu drain, which is found to increase further with industry growth, whereas population growth did not impact its loading. Faecal coliform loading increases with population growth at all checkpoints and is not affected by industrial growth.

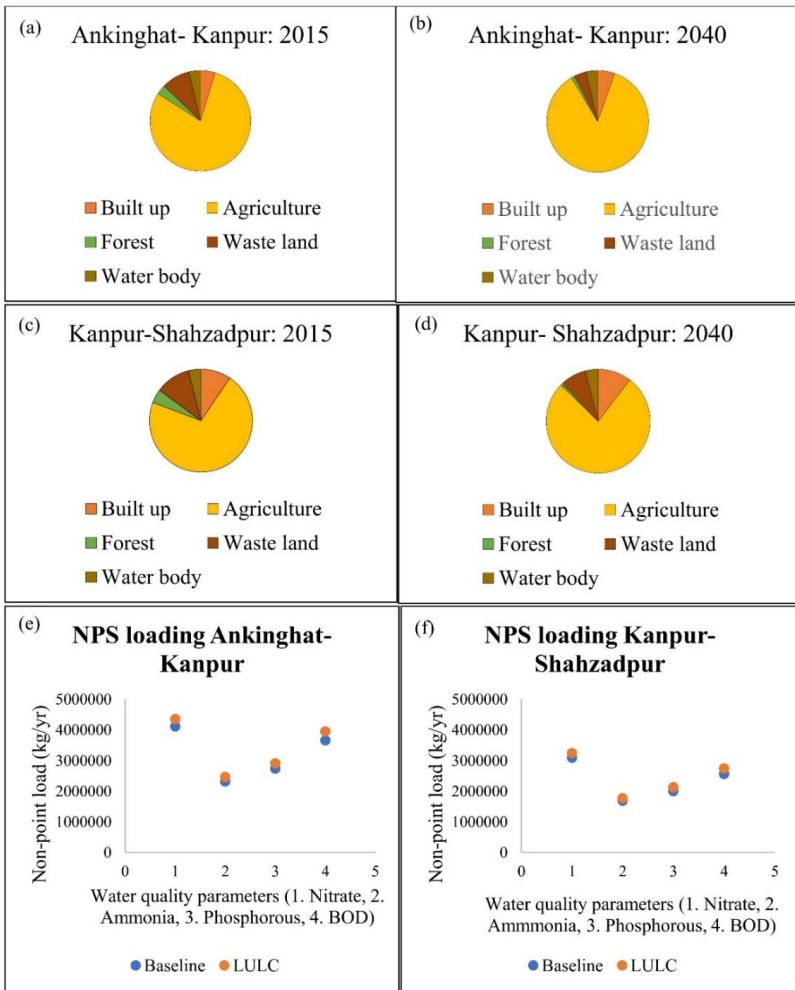

Too small to see the diff. too much blank space. use common legend to save space. Perhaps combine the plots as a column graph so in the next figure.

Figure 4: Land use land cover projections. Percentage composition of land use for Ankinghat to Kanpur in (a) 2015 and (b) 2040, for Kanpur to Shahzadpur in (c) 2015 and (d) 2040. Non-point source pollution load for (e) Ankinghat to Kanpur and (f) Kanpur to Shahzadpur.



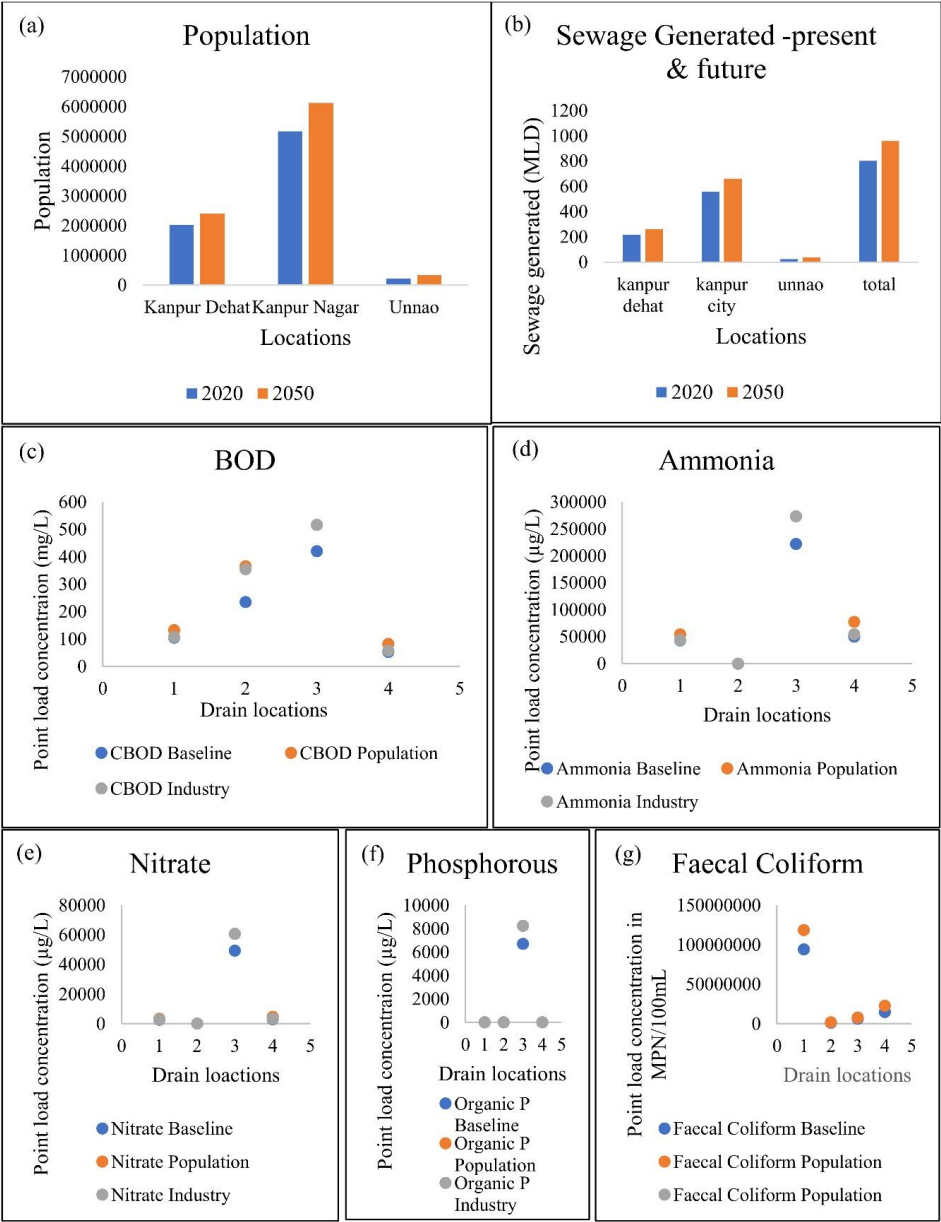

348  
349 Figure 5: (a) Population projections for the catchment area of drains; (b) Sewage generated  
350 comparison for 2020 and 2050; Point load comparison of population and industry projections  
351 with the baseline for (c) BOD, (d) Ammonia, (e) Nitrate, (f) Phosphorous and (g) Faecal  
352 Coliform.

353



## 354 **3.2 Streamflow changes under changing climate and land use land cover**

355 The 30Q10 flow comparison for the climate change and land use land cover projections  
 356 simulated from the HEC-HMS model in Figure 3(d) shows a reduction of low flows for the  
 357 future. The annual minima streamflow at Ankinghat also shows a considerable decrease in the  
 358 magnitude of low flows in the future, with more reduction corresponding to the RCP 8.5  
 359 (Supplementary Figure S3). The month with the lowest flow is March (Supplementary Figure  
 360 S4). Even though the Ganga River is snow-fed, the barrages constructed upstream nullify the  
 361 impact of snowmelt on streamflow at Ankinghat, thus having low flows during summer (Santy  
 362 et al., 2020). The significant reduction in the summer month flows poses a severe threat to the  
 363 quantity and quality of water. The low flows are predicted to reduce with high warming in  
 364 Europe (Marx et al., 2018).

365 The land use land cover is not found to affect low flow significantly, whereas climate change  
 366 significantly reduces the low flow. The increase in agricultural land simulated can lead to an  
 367 increased evapotranspiration and can affect low flows. However, significant changes in low  
 368 flows are not identified and can be due to the large catchment area for Ankinghat and the  
 369 resulting complex physical processes resulting in a slight change in streamflow at Ankinghat  
 370 with land-use changes (Fohrer et al., 2001). The curve numbers of each sub-catchment had  
 371 significant changes with LULC projections (Supplementary Figure S5); however, it was  
 372 insufficient to make significant changes in streamflow. The effect of land-use changes on  
 373 streamflow is found to be more pronounced at the subbasin than at the basin level (Zhou et al.,  
 374 2013).

## 375 **3.3 Individual effects of climate change, land use land cover, population and industrial** 376 **growth on water quality**

377 The individual effects of major drivers of pollution- climate change, land use land cover,  
 378 population and industries on water quality simulated using the coupled HEC-HMS and  
 379 QUAL2K model is compared in terms of percentage changes of nine water quality parameters  
 380 for each driver from baseline period (Figure 6).

### 381 **3.3.1 Influence of climate change on water quality**

382 Climate change affects water quality mainly by low flow and stream temperature changes.  
 383 Climate change is found to affect all water quality parameters significantly (Figure 6), with a  
 384 higher percentage change corresponding to higher warming scenario RCP 8.5. The effect of



climate change dominates the effect of other drivers for DO concentration (Figure 6(a) & 7(a)) with a maximum percentage reduction of 60% for Kanpur downstream corresponding to RCP 8.5. Climate change has a more significant effect on DO, which can be attributed to a reduction in saturation DO with a rise in stream temperature and a reduction in dilution volume followed by a decrease in low flows. The percentage increase in BOD is more than 100% for future climate at Kanpur and Jajmau downstream points. The percentage increase in ammonia with RCP 4.5 and 8.5 is also more than 100% for Kanpur and Jajmau downstream. The percentage change in P components with climate change is above 50% for Kanpur and Jajmau downstream. The percentage change in nitrate is found to be less than 18% with changes in driver. The percentage change in nitrate concentration is small compared to other water quality parameters (Figure 6(d)) because of the higher denitrification rate for this river stretch. Increase in pollutant concentration with climate change is due to reduced dilution volume following a decreased low flow. It can be noted that the nutrient concentration is high during the low flow period, and climate change is the important driver aggravating pollution; hence, climate change alone can lead to eutrophication during the low flow period for the Ganga river stretch considered here. The climate change leads to increased pollution of FC in Kanpur and Fatehpur downstream with an increase in more than 50% of the concentration, while the concentration is found to reduce for Jajmau downstream and Shahzadpur (20 to 85%) (Figure 6(i)). This reduction at Jajmau is due to FC's higher sensitivity to temperature (Santy et al., 2020).

### 3.3.2 Influence of land use land cover on water quality

The land use land cover change leads to changes in non-point source pollutant load and hence an increase in pollution. The effect of land use land cover on water quality parameters are found to be minimal except for nutrients with a percentage change less than 5%. The percentage change in ammonia with LULC for all checkpoints is found to be less than 4%. The effect of LULC on nitrate is more in Jajmau than in other checkpoints (Figure 7(d)), however, the percentage change in nitrate is less than 1. The land use land cover alone doesn't lead to higher pollution; however together with climate change it can aggravate pollution due to reduction in dilution volume for the increased NPS load.

### 3.3.3 Influence of population on water quality

The population growth is found to affect all water quality parameters except for P, due to the absence of P in domestic sewage. The percentage change in BOD with population is found to be 30%. The effect of population growth is more pronounced at the Jajmau downstream due to



417 additional point loads projected with population. However, the extra loading at Pandu river  
 418 drains due to population growth is offset by the excess flow from Pandu river drains. The effect  
 419 of population on DO is slightly higher than that of industrial growth at Kanpur downstream.  
 420 However, industrial growth is dominant for other checkpoints because Kanpur downstream is  
 421 the immediate downstream point of the industrial loading, and hence it will take some distance  
 422 downstream to reach the impact. The effect of population on nitrate varies from 2 to 4% except  
 423 for Kanpur downstream, where the percentage increase is less than 1. The percentage change  
 424 in ammonia and TN with population growth ranges from 13-24% and 6-17% respectively. The  
 425 effect of population on FC concentration is dominant with a percentage change ranging from  
 426 20-30% for all check points. The increase in concentration with population growth is due to  
 427 the increased point loads, resulting in high pollution downstream of the drain confluence.

#### 428 **3.3.4 Influence of industry on water quality**

429 Industrial growth is found to affect DO, BOD and ammonia. Industrial growth with 30% rise  
 430 in industry (INDS+30) is found to have more impact than population growth on BOD with an  
 431 increase of about 40% from baseline at all checkpoints. Ammonia concentration is found to be  
 432 more affected by industrial growth in the Jajmau downstream (Figure 6(c) & 7(c)) with a  
 433 percentage change varying from 20 to 30%. The P components are not found to change with  
 434 industrial growth, as the primary source of P load in this river stretch is fertilizers used in  
 435 agricultural fields (Supplementary Table1). The only point load of P is from an industry  
 436 effluent from Jajmau and is well within limits. The industrial growth does not affect FC  
 437 concentration due to absence of FC in the industry effluent. A considerable percentage  
 438 reduction of 10% in DO concentration is simulated at Jajmau d/s with a 30% rise in industry.  
 439 The industrial growth resulted in higher pollution due to an increased point load.

#### 440 **3.3.5 Percentage contribution of each driver to water quality change**

441 The percentage contribution of each driver for future water quality change calculated from the  
 442 change ratio for Kanpur and Shahzadpur is shown in Figures 7 and 8. The major drivers of  
 443 pollutants such as population, industries, land use land cover and climate change have a large  
 444 effect on all water quality parameters (Figure 6). It can be noted that the contribution of climate  
 445 change dominates the effect contribution of other drivers (Figure 7 & 8). This can be due to the  
 446 dominating effect of streamflow over the changes in point and non-point loads due to  
 447 population, industrial and land use land cover growth. The effect of climate change decreases



448 downstream of the stretch due to high flow from Pandu river drains joining the river  
449 (Supplementary Figure S6, S7)

450 The effect of each driver is found to change with checkpoints (Figure 7 & Supplementary  
451 Figure S6) and can be attributed to the varied state of loads at each checkpoint. Downstream  
452 of Kanpur can be considered a representative of critical locations or drain confluence points,  
453 whereas Shahzadpur can be considered a representative of a location away from point loads.  
454 The pollution hotspot points are more vulnerable to climate change (Figure 7 & Supplementary  
455 Figure S8) and its influence is very high and, hence, neglecting climate change in future designs  
456 can have severe implications.

457 Climate change's contribution is larger compared with other drivers, especially at Kanpur  
458 downstream. The contribution of climate change to DO, BOD, ammonia, nitrate, TN, organic  
459 P, inorganic P and TP is 85%, 70%, 85%, 90%, 85%, 95%, 95% and 95% respectively (Figure  
460 7). This high contribution of climate change is due to the reduced dilution volume. The  
461 contribution of population, industry and land use together is only around 20 to 30%. The  
462 contribution of population to DO, BOD, ammonia, nitrate, and TN is 6%, 12%, 5%, 2%, and  
463 7% respectively (Figure 7). The contribution of industry growth is comparable to the  
464 contribution of population growth. The major contribution of FC is from climate change and  
465 population growth, with an individual contribution of 65 and 35% (Figure 7). Land use land  
466 cover has a considerable effect on nitrate and P concentrations in comparison with other water  
467 quality parameters, however the contribution is only 5%. The effect of population, industry and  
468 land use tend to increase downstream due to the addition of more flows from Pandu river drains  
469 resulting in an increased flow and hence an increased dilution volume.

470 The individual contribution of climate change is reduced from Kanpur to Shahzadpur. The  
471 contribution of climate change to DO, BOD, ammonia, nitrate, TN, organic P, inorganic P and  
472 TP is 35%, 30%, 25%, 60%, 40%, 60%, 75% and 75% (Figure 8). The contribution of  
473 population to DO, BOD, ammonia, nitrate, and TN, is 35%, 30%, 40%, 20%, and 30%,  
474 respectively (Figure 8). Climate change, population and industry are found to contribute  
475 equally to DO and BOD concentration. The contribution of population to FC has risen from  
476 Kanpur to Shahzadpur; however, climate change contribution is slightly higher than  
477 population. The contribution of climate change to ammonia increase reduced for Shahzadpur,  
478 with population and industrial contribution overwhelming the effect of climate change.  
479 However, climate change contribution is dominant for nitrate and TN. The higher contribution



of ammonia for population and industrial growth is due to large ammonia concentration in  
sewage and industrial effluent. The contribution of land use land cover on P components is  
large with 20 to 40% contribution. However, climate change is found to dominant for P  
concentration due to low dilution volume followed by a reduced low flow.

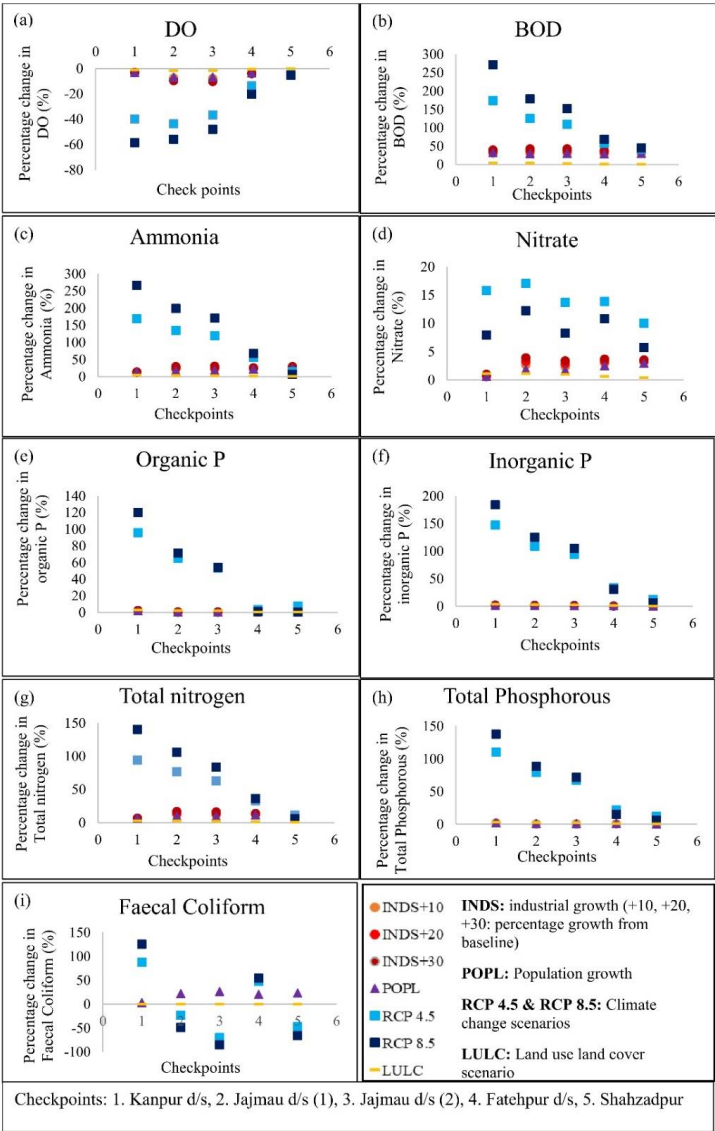

484

485 Figure 6: Percentage change in water quality parameters for climate change (RCP 4.5 & RCP  
486 8.5), land use land cover (LULC), population (POPL), and Industry (INDS) growth. (+10,+20  
487 and +30 correspond to the percentage increase in industry in the future) for (a) DO, (b) BOD,



488 (c) ammonia, (d) nitrate, (e) organic phosphorous, (f) inorganic phosphorous, (g) total nitrogen,  
 489 (h) total phosphorous, and (i) faecal coliform.

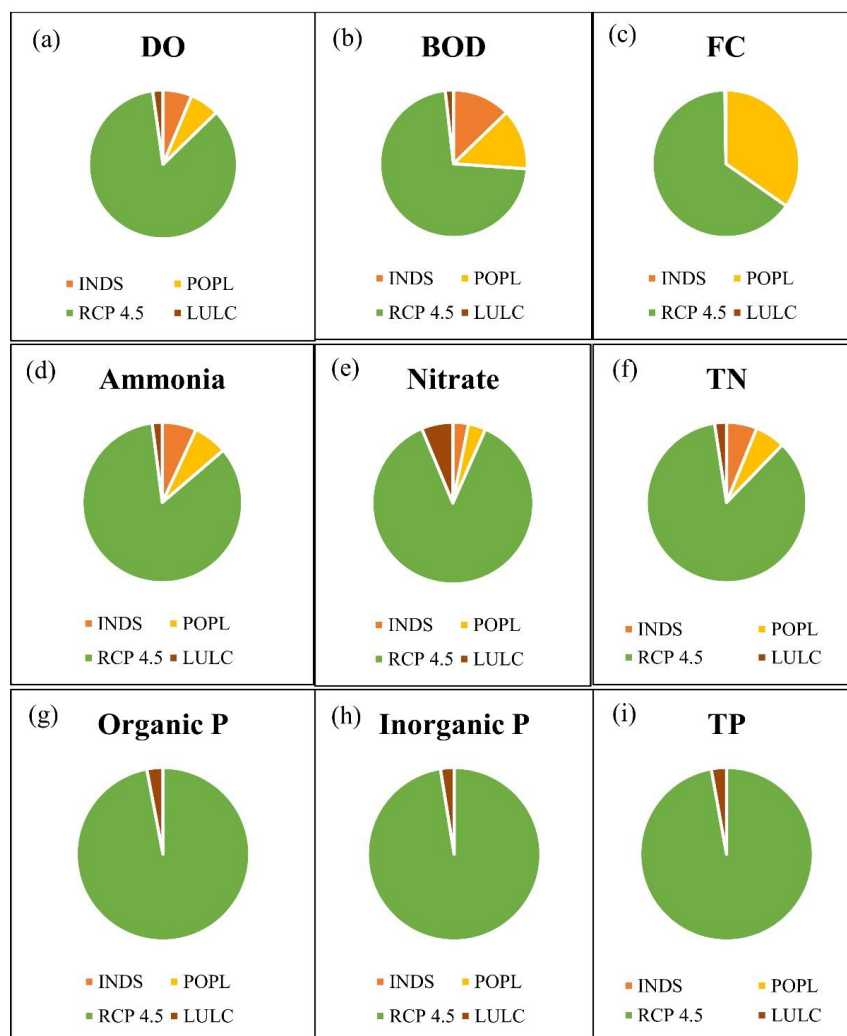

490

491 Figure 7: Individual effects of climate change (RCP 4.5), land use land cover (LULC), industry  
 492 (INDS) and population (POPL) on (a) DO, (b) BOD, (c) Faecal coliform, (d) Ammonia, (e)  
 493 Nitrate, (f) total nitrogen, (g) organic-, (h) inorganic- and (i) total phosphorous for Kanpur



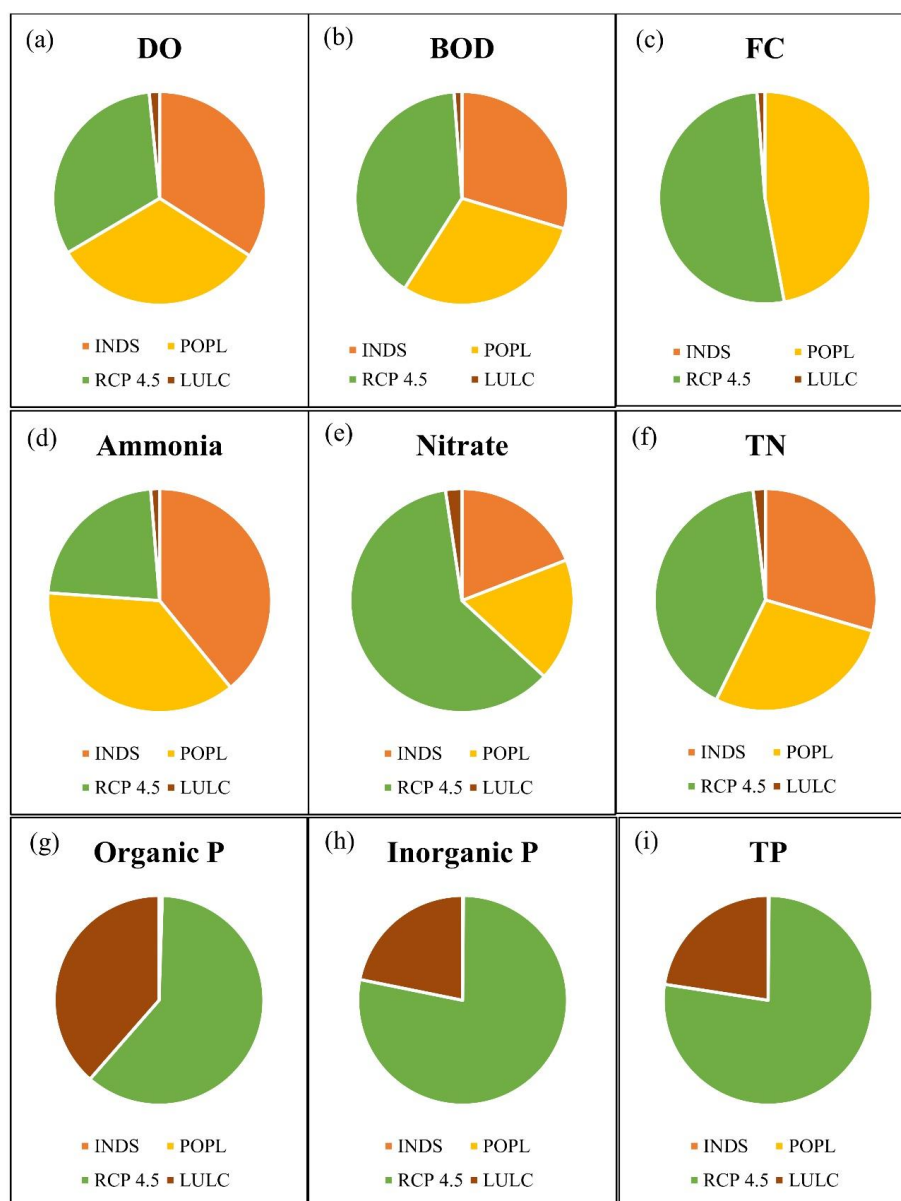

494

495 Figure 8: Individual effects of climate change (RCP 4.5), land use land cover (LULC), industry  
 496 (INDS) and population (POPL) on (a) DO, (b) BOD, (c) Faecal coliform, (d) Ammonia, (e)  
 497 Nitrate, (f) total nitrogen, (g) organic-, (h) inorganic- and (i) total phosphorous for Shahzadpur

498

499



### 500 **3.4 Water quality for socio-environmental scenarios**

501 The treatment units are usually designed considering only the population aspect. The above  
 502 section 3.3 shows climate change, land use, and industrial growth also affect water quality  
 503 considerably. The water quality is analyzed for the future considering population growth,  
 504 industrial growth, climate change and LULC and the effectiveness of the treatment proposals  
 505 are analyzed with the help of socio-environmental scenarios. The point loads calculated for  
 506 socio-environmental scenarios are given in Supplementary Text S7. The results of important  
 507 scenarios for the critical checkpoints are shown in Figures 9 and 10. The results of all scenarios  
 508 for the entire study area are given in Supplementary Figures S9 & S10. For the scenarios  
 509 'C45LP' and 'C85LP', DO goes below  $4 \text{ mgL}^{-1}$  a 35km, and 51km stretch, respectively,  
 510 downstream of Kanpur drains (Figure 9(a) & Supplementary Figure S9). It shows the  
 511 intensification of pollution for future climate change, land use, industry and population if no  
 512 actions are taken. Also, it can be noted that the pollution for the RCP 8.5 scenario is higher  
 513 than RCP 4.5 (Figure 9 & Supplementary Figure S9). With all sewer lines laid and STPs  
 514 working at full capacity, DO improves considerably for the entire stretch, making it fit for  
 515 aquatic life. For the scenarios 'C45LPSPSM' and 'C85LPSPSM', the DO rises above  $4 \text{ mgL}^{-1}$ ,  
 516 revealing that the river is safe for aquatic life even with the present and proposed treatment  
 517 plants. The increase in treatment level to tertiary didn't have much effect on DO concentration.  
 518 It can be noted that even in the adverse climate change scenario of RCP 8.5, with the proposed  
 519 STPs, the goals of GAP can be achieved in terms of DO concentration (Figure 9 &  
 520 Supplementary Figure S9).

521 The BOD concentration increases drastically for 'C45LP' and 'C85LP' from the baseline due to  
 522 the high pollution load due to climate change, LULC, industry and population. Even for the  
 523 baseline scenario, the stretch after the confluence of Kanpur drains exceeds the bathing class  
 524 limit of  $3 \text{ mgL}^{-1}$ . The only scenario in which the entire stretch achieves the objective of GAP is  
 525 'C45LPS50SD' (Figure 9(b) & Supplementary Figure S9). However, a significant reduction in  
 526 concentration is observed from scenarios 1 to 5. The tertiary treatment greatly reduces the  
 527 pollutant concentration concerning BOD (Supplementary Figure S9). Also, it can be seen that  
 528 BOD concentration improves if domestic sewage only reaches the STPs, implying that STP  
 529 capacity for 2050 population demand is essential to have good water quality (Supplementary  
 530 Figure S9). The 2020 demand STP capacity will not be sufficient even if we provide tertiary  
 531 treatment (Figure 9(b)). For scenario 'C45LPS50SM', the entire stretch except for the 10km  
 532 downstream of Kanpur drains falls within bathing class limits.

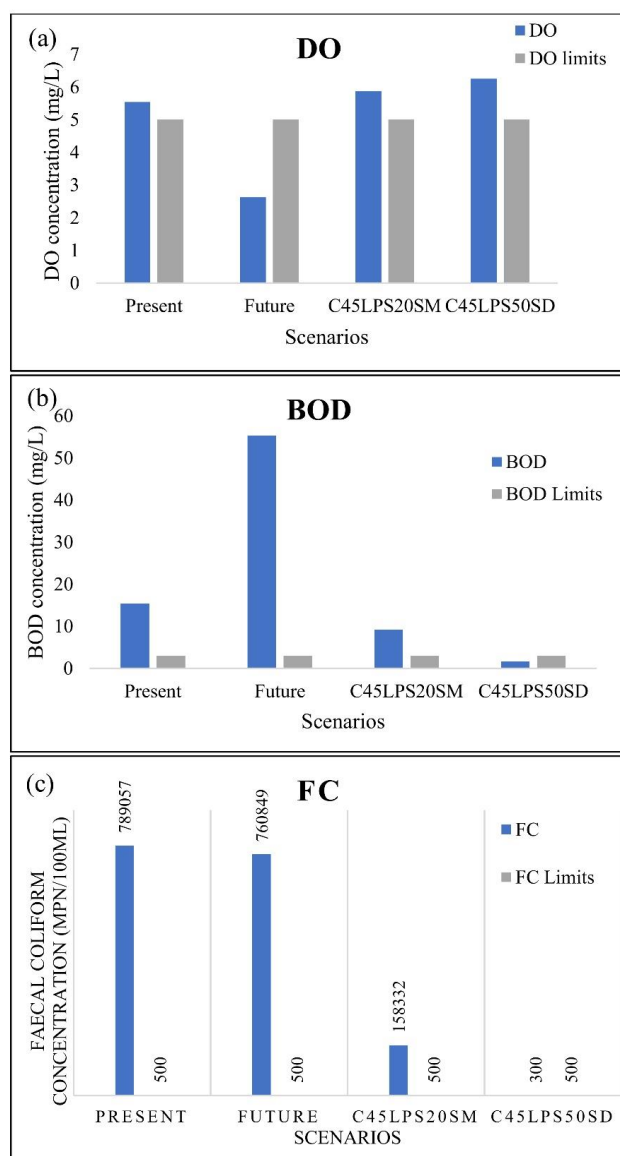

533

534 Figure 9: Water quality for future under proposed treatment. (a) DO, (b) BOD and (c) Faecal  
 535 coliform (FC) for socio-environmental scenarios. 'C45LPS20SM' is the treatment proposed by  
 536 authorities for 2050; 'C45LPS50SD' is the scenario proposed in this paper to contain the  
 537 pollution.

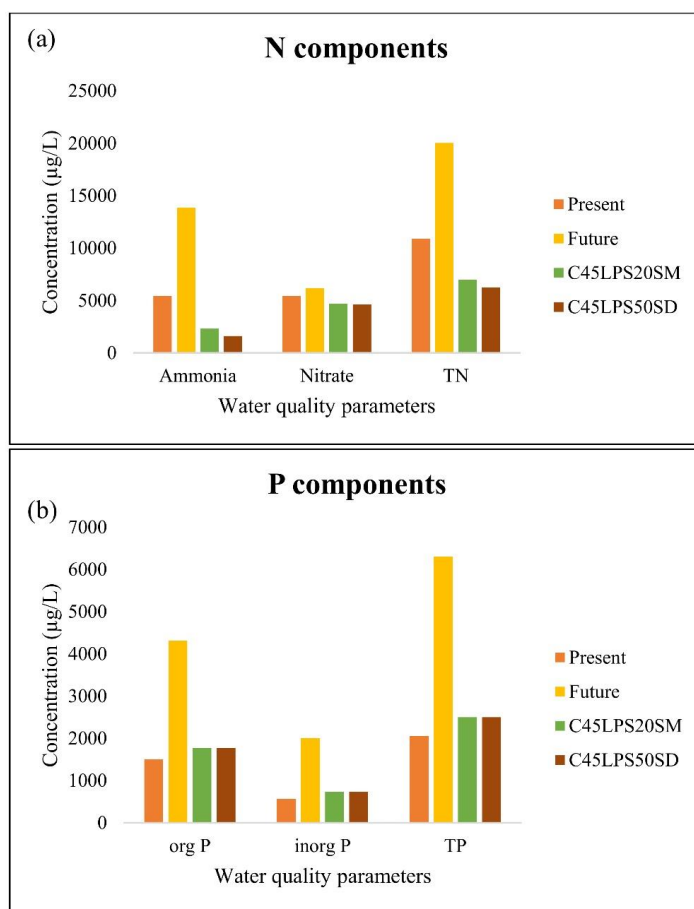

538

539 Figure 10: Nutrient projections for future under proposed treatment. (a) Nitrogen components  
 540 (ammonia, nitrate and total nitrogen); (b) Phosphorous components (organic-, inorganic- and  
 541 total phosphorous). 'C45LPS20SM' is the treatment proposed by authorities for 2050;  
 542 'C45LPS50SD' is the scenario proposed in this paper to contain the pollution.

543 Microbial pollution is a significant challenge that requires great attention. Most drains carry  
 544 wastewater with a very high FC concentration (in the order of  $10^8$ ). Faecal coliform profile  
 545 plots for socio-environmental scenarios 1-5 and climate change scenarios are given in Figure  
 546 9(c). A drastic reduction in FC concentration is observed with increased STP capacity. It is  
 547 noticed that only for scenario 5b, the entire stretch is fit for bathing concerning FC  
 548 concentration (Figure 9(c)). Even if we provide STPs to meet the demand of the 2050  
 549 population (Scenario 5a), due to the added flow from industrial discharge, the capacity of the  
 550 STPs will not be sufficient to cater to domestic and industrial wastewater flow. Hence, some



551 amount of the sewage overflows or gets bypassed, and as a result, some portion of untreated  
 552 sewage reaches the river, further adding to pollution. In scenario 5b, only domestic sewage  
 553 reaches the STP; hence the capacity can meet the demand, and the treated industrial wastewater  
 554 is discharged downstream of the STP influent point of the drain or through separate drains and  
 555 discharged to the river. Unlike other pollutants, due to very high FC loading in the untreated  
 556 sewage, mixing with treated water, even though it reduces the concentration, fails to comply  
 557 with the standards. The proposed treatment cannot contain FC pollution due to aggravated  
 558 pollution in future with climate change, land use, industry and population.

559 The high concentration of ammonia, nitrate and TN is drastically reduced for scenarios 2 to 5  
 560 (Figure 10 (a) & Supplementary Figure S10). The tertiary treatment brings down ammonia  
 561 concentration considerably. Scenarios 3 and 4 do not change much of the nitrate concentration  
 562 because the existing STPs are efficient in removing nitrates, and tertiary treatment is not  
 563 required. Nitrate is a crucial water quality parameter as most people depend on groundwater  
 564 for drinking. Nitrate concentration for the study area is below 7mg/L, well within drinking  
 565 water limits (45mg/L), hence no health hazards. TN and ammonia follow the same trend  
 566 (Figure 10 (a)& Supplementary Figure S10).

567 The organic P pollution increases with future climate, LULC, industry and population, which  
 568 gets drastically reduced for all scenarios 2 to 5 (Figure 10 (b) & Supplementary Figure S10).  
 569 The significant contribution of phosphorous loading is diffuse sources. Only Jajmau drains  
 570 carry a phosphorous load. The treatment given at the STPs reduces the pollution from point  
 571 loads. Inorganic P also varies in the same order as organic P. The initial variation up to Kanpur  
 572 is the contribution of non-point source pollution (Supplementary Figure S10). High  
 573 concentration of nitrogen and phosphorous can lead to eutrophication, a severe issue for river  
 574 health. Also, with the second scenario of proposed STPs, sewage gets treated fully at Jajmau,  
 575 and hence P pollution is under control for the future.

576 The ranking of the socio-environmental scenario is given in Table 3, with rank 1 for the best  
 577 water quality. 'C45LPS50SD' has resulted in good water quality in terms of bathing standards.  
 578 Hence, the STP capacity to meet 2050 population demand and separate treatment for industrial  
 579 and domestic wastewater is very important in achieving GAP goals. The treated industrial  
 580 wastewater should be discharged into the river directly or used for irrigation instead of draining  
 581 it into the drains that find their way to STP. The water quality for scenarios 2 to 5 (Table 1) fits  
 582 aquatic life. Hence, the planning scenario successfully achieves good water quality, except for



583 BOD and microbial pollution, which is a significant concern, mainly if the water is used for  
 584 irrigation, bathing, or drinking purposes.

585 Table 3: Ranking of treatment scenarios with rank 1 for the best water quality

| Scenarios  | DO | BOD | FC | Ammonia | Nitrate | TN | Organic P | Inorganic P | TP |
|------------|----|-----|----|---------|---------|----|-----------|-------------|----|
| C45LP      | 15 | 15  | 16 | 15      | 16      | 15 | 3         | 3           | 3  |
| C45LPSPSM  | 14 | 9   | 14 | 14      | 8       | 14 | 1         | 2           | 1  |
| C45LPS20SM | 6  | 6   | 7  | 6       | 3       | 4  | 1         | 2           | 1  |
| C45LPS20SD | 5  | 5   | 5  | 5       | 5       | 6  | 1         | 2           | 1  |
| C45LPS20TM | 7  | 7   | 6  | 7       | 4       | 5  | 1         | 2           | 1  |
| C45LPS20TD | 4  | 4   | 4  | 4       | 6       | 7  | 1         | 2           | 1  |
| C45LPS50SM | 3  | 2   | 3  | 3       | 2       | 2  | 1         | 2           | 1  |
| C45LPS50SD | 1  | 1   | 1  | 1       | 1       | 1  | 1         | 2           | 1  |
| C85LP      | 16 | 16  | 9  | 16      | 15      | 16 | 4         | 4           | 4  |
| C85LPSPSM  | 8  | 12  | 15 | 8       | 14      | 8  | 2         | 1           | 2  |
| C85LPS20SM | 11 | 13  | 13 | 11      | 10      | 9  | 2         | 1           | 2  |
| C85LPS20SD | 10 | 11  | 10 | 10      | 12      | 11 | 2         | 1           | 2  |
| C85LPS20TM | 12 | 14  | 11 | 12      | 11      | 10 | 2         | 1           | 2  |
| C85LPS20TD | 9  | 10  | 12 | 9       | 13      | 12 | 2         | 1           | 2  |
| C85LPS50SM | 13 | 8   | 8  | 13      | 9       | 13 | 2         | 1           | 2  |
| C85LPS50SD | 2  | 3   | 2  | 2       | 7       | 3  | 2         | 1           | 2  |

586

#### 587 4. Conclusions:

588 After the Ganga Action Plan (GAP) was launched in 1986 (Environment & Forests Division  
 589 and Water Resources Division Planning Commission Government of India, 2009), there have  
 590 been efforts toward a pollution-free Ganga River. Water quality has considerably improved but  
 591 it does not comply with bathing class limits, the objective of GAP. The individual effects of  
 592 significant drivers of pollution, climate change, land use land cover, population and industry  
 593 on water quality are analyzed for the most polluted stretch of Ganga river passing through  
 594 Kanpur in the mid-21st century using a coupled HEC-HMS and QUAL2K model. Climate  
 595 change, land use land cover, population and industry growth affect water quality. However,  
 596 climate change is found to dominate the effect of other drivers for the low flow period due to  
 597 lower dilution volume followed by a reduction in low flows simulated for the future with a  
 598 percentage contribution of above 70% at Kanpur.

599 The major factors affecting water quality in the future- population, land use land cover, sewer  
 600 lines connectivity, STP capacity, treatment level and the type of sewage, domestic or mixed  
 601 reaching STP, treatment proposals for Ganga river - are considered in developing five socio-



environmental scenarios. Five socio-environmental scenarios were developed for the study area to evaluate the effectiveness of the treatment proposals made by the authorities to achieve the GAP objective by the mid-21st century. The results show that the proposed and tendered STPs will not be sufficient to bring water quality to the bathing class, the objective of GAP. However, DO and nutrient pollution is improved with this proposed treatment. The BOD and microbial pollution are the parameters which need additional attention to save the Ganga river from future pollution. The only scenario by which BOD and FC can be brought to bathing class limits are 'C45LPS50SD' and 'C85LPS50SD', where the STPs to meet the demand of the 2050 population is provided. By increasing the STP capacity, the water quality is found to improve. Also, water quality is improved by increasing the treatment level to tertiary. However, treatment capacity is more important than treatment level, especially for microbial pollution. Raw sewage has a significantly high FC concentration; hence, no untreated sewage should reach the river, as it will deteriorate water quality, especially in the low flow period.

This study will be highly beneficial for the policymakers and the authorities as it will help them take the mitigation actions to reach GAP's objective. Also, the study shows the quantum of benefits of segregating sewage reaching STPs. Even if the STP capacity of 2050 is in place and the mixed sewage reaches STPs, the objective of GAP cannot be achieved unless the treatment is increased to the tertiary level. The missing data of some water quality parameters at some stations, model uncertainty, and parameter uncertainty contribute to some uncertainty in our work. However, we believe that the qualitative results will not be affected. Also, the land use projections considered assumes the transition in the past to occur in future too which can lead to some uncertainty.

This study considers a hypothetical growth in the industry in the future and hence can affect the results slightly. As the industrial effluent discharge is significantly less than the municipal discharge, its effect will not be dominant on water quality, provided they are discharging at the effluent disposal limits. The climate change, LULC, growth industry and population effects on water quality for the monsoon season and extreme events for the hotspots of the Ganga River can be a future scope of the study. In our study, we have not considered the cost incurred for the mitigation strategy adopted; hence a waste load allocation model along with our present study would give an idea of the ideal treatment required at the industries and STPs to reach the objective of GAP.

633





634 Data Availability

635 The data that support the findings of this study are available from Ministry of Water Resources,  
636 Government of India but restrictions apply to the availability of these data, which were used  
637 under license for the current study, and so are not publicly available.

638 Author contributions

639 Sneha Santy developed the model, made computational runs and prepared first draft of the  
640 manuscript including figures. Mujumdar conceptualized the model, facilitated data collection  
641 and edited the manuscript. Bala helped in devising climate change scenarios and review of  
642 manuscript.

643 Competing interests

644 The authors declare that they have no conflict of interest.

645 Acknowledgement

646 We thank the Chief Engineer, Upper Ganga Basin Organisation, Central Water Commission,  
647 Lucknow for providing very useful data on streamflow, water quality and hydraulic  
648 characteristics for the river stretch studied, India Meteorological Department for providing  
649 temperature data, National Remote Sensing Centre, Hyderabad for providing us land use land  
650 cover data, United States Geological Survey for providing DEM data, the European Centre for  
651 Medium-Range Weather Forecasts for providing atmospheric data and NASA Center for  
652 Climate Simulation for providing NASA Earth Exchange Global Daily Downscaled Climate  
653 Projections. We thank Uttar Pradesh Pollution Control Board and State Mission for Clean  
654 Ganga Uttar Pradesh for providing data on drain, STP capacity and sewer network. The authors  
655 thank Dr. Ila Chawla for sharing the land use projection files. We also thank the Divecha Centre  
656 for Climate change, IISc, Bangalore, for providing Grantham Fellowship to the first author.  
657 The funding received from the Ministry of Earth Sciences (MoES), Government of India,  
658 through the project, "Advanced Research in Hydrology and Knowledge Dissemination",  
659 Project No.: MOES/PAMC/H&C/41/2013-PC-II, is also gratefully acknowledged. The second  
660 author acknowledges the support received through the JC Bose Fellowship (Number,  
661 JCB/2018/000031). The authors are thankful to Dr. Pankaj Dey for the help with proof reading  
662 the manuscript.

663



664 **References:**

- 665 1. Al-Ahmad A, Daschner FD, Kummerer K (1999). Biodegradability of cefotiam,  
 666 ciprofloxacin, meropenem, penicillin G, and sulfamethoxazole and inhibition of  
 667 wastewater bacteria. *Arch Environ Contam Toxicol* 37:158–63.
- 668 2. Astaraie-Imani M, Zoran Kapelan, Guangtao Fu, David Butler (2012). Assessing the  
 669 combined effects of urbanization and climate change on the river water quality in an  
 670 integrated urban wastewater system in the UK. *Journal of Environmental Management*  
 671 112 (2012) 1-9.
- 672 3. Bonus, CA (Ed.), 2018. Ganga River Basin Planning Assessment Report. Main volume  
 673 and Appendices. Deltares with AECOM and Future Water for the World Bank and the  
 674 Government of India, Report 1220123-002-ZWS-0003.
- 675 4. Bourdeau-Goulet S, Hassanzadeh E (2021). Comparisons Between CMIP5 and CMIP6  
 676 Models: Simulations of Climate Indices Influencing Food Security, Infrastructure  
 677 Resilience, and Human Health in Canada. *Earth's Future* 9, e2021EF001995.  
 678 <https://doi.org/10.1029/2021EF001995>
- 679 5. Central Water Commission & National Remote Sensing Centre (2014). Government of  
 680 India Ministry of Water Resources GANGA BASIN.
- 681 6. Central Pollution Control Board. Pollution Assessment: River Ganga (CPCB (2013)
- 682 7. Chawla I. and Mujumdar P. P., 2018. Partitioning uncertainty in streamflow projections  
 683 under nonstationary model conditions. *Advances in Water Resources* 112: 266–282.
- 684 8. Chapra S C and Pelletier G J 2003. QUAL2K: A Modeling Framework for Simulating  
 685 River and Stream Water Quality: Documentation and User's Manual. Civil and  
 686 Environmental Engineering Dept., Tufts University, Medford, MA.
- 687 9. Choi K, Kima Y, Park J, Park CK, Kim M, Kim HS, Kim P (2008). Seasonal variations  
 688 of several pharmaceutical residues in surface water and sewage treatment plants of Han  
 689 River. *Sci Total Environ* 405:102–28.
- 690 10. Davids, J. C. et al. Quantifying the connections—linkages between land-use and water  
 691 in the Kathmandu Valley, Nepal. *Environmental Monitoring and Assessment* 190, 304  
 692 (2018).
- 693 11. Environment & Forests Division and Water Resources Division Planning Commission  
 694 Government of India, 2009. Report on utilization of funds and assets created through  
 695 Ganga Action Plan in states under GAP



- 696 12. Fohrer, N., Haverkamp, S., Eckhardt, K., & Frede, H.-G. (2001). Hydrologic response  
697 to land-use changes on the catchment scale. *Physics and Chemistry of the Earth, Part*  
698 *B: Hydrology, Oceans and Atmosphere*, 26, 577-582
- 699 13. Gyawali, S., Techato, K., Monprapussorn, S. & Yuangyai, C. Integrating Land use and  
700 Water quality for Environmental based land use planning for U-tapao River Basin.  
701 Thailand. *Procedia – Social and Behavioral Sciences* 91, 556–563 (2013).
- 702 14. Hernando MD, Mezcuca M, Fernandez-Alba AR, Barcelo D (2006). Environmental risk  
703 assessment of pharmaceutical residues in wastewater effluents, surface waters and  
704 sediments. *Talanta* 69:334–42.
- 705 15. Hunter P. Climate change and waterborne and vector-borne diseases. *Journal of*  
706 *Applied Microbiology*, 94 (2003), pp. 37S-46S
- 707 16. Hurst AM, Edwards MJ, Chipps M, Jefferson B, Parsons SA (2004). The impact of  
708 rainstorm events on coagulation and clarifier performance in potable water treatment.  
709 *Sci Total Environ* 321:219–30.
- 710 17. Indian Institutes of Technology, 2010a. Guidelines for the Preparation of Urban River  
711 Management Plan (URMP) for all Class I Towns in Ganga River Basin. GRB EMP:  
712 Ganga River Basin Environment Management Plan. Report code:  
713 002\_GBT\_IIT\_EQP\_S&R\_01\_Ver 1\_Dec2010.
- 714 18. Indian Institutes of Technology, 2010b. River Ganga at a Glance: Identification of  
715 Issues and Priority Actions for Restoration. GRB EMP: Ganga River Basin  
716 Environment Management Plan. Report code: 001\_GBT\_IIT\_GEN\_DAT\_01\_Ver  
717 1\_Dec2010.
- 718 19. Indian Institutes of Technology, 2010c. Guidelines for Implementation of Sewage  
719 Collection, Diversion, Pumping, Treatment, and Reuse (Sewage CDPTR)  
720 Infrastructure in Class I Towns. GRB EMP: Ganga River Basin Environment  
721 Management Plan. Report code: 004\_GBT\_IIT\_EQP\_S&R\_03\_Ver 1\_Dec2010.
- 722 20. Indian Institutes of Technology, 2010d. Sewage Treatment in Class I Towns:  
723 Recommendations and Guidelines. GRB EMP: Ganga River Basin Environment  
724 Management Plan. Report code: 003\_GBT\_IIT\_EQP\_S&R\_02\_Ver 1\_Dec2010.
- 725 21. Indian Institutes of Technology, 2011. Prevention of River Pollution by Urban Sewage:  
726 Recommendations from Policy and Governance Perspective based on a Model Case  
727 Study. GRB EMP: Ganga River Basin Environment Management Plan. Report code:  
728 010\_GBT\_IIT\_PLG\_ANL\_04\_Ver 1\_Dec2011.



- 729 22. Indian Institutes of Technology, 2012. Water Quality in the Ganga River and Efficacy  
730 of Sewage Treatment Process in Coliform Removal: A Case for Adopting Tertiary  
731 Treatment. GRB EMP: Ganga River Basin Environment Management Plan. Report  
732 code: 023\_GBP\_IIT\_EQP\_ANL\_01\_Ver 1\_June2012.
- 733 23. Indian Institutes of Technology, 2013. Status of Urbanization and Industrialization  
734 in Middle Ganga Basin. GRBMP: Ganga River Basin Management Plan. Report Code:  
735 051\_GBP\_IIT\_SEC\_ANL\_13\_Ver 1\_Dec 2013
- 736 24. Jacobs, S. R. et al. Using high-resolution data to assess land use impact on nitrate  
737 dynamics in East African Tropical Montane Catchments. *Water Resources Research*  
738 54, 1812–1830 (2018).
- 739 25. Jin, L. et al. Assessing the impacts of climate change and socio-economic changes on  
740 flow and phosphorus flux in the Ganga river system. *Environmental Science: Processes*  
741 *and Impacts* 17(6), <https://doi.org/10.1039/c5em00092k> (2015).
- 742 26. Khattiyavong C and Lee H S. Performance Simulation an Assessment of an  
743 Appropriate Wastewater Treatment Technology in a Densely Populated Growing City  
744 in a Developing Country: A Case Study in Vientiane, Laos. *Water* 2019, 11, 1012;  
745 doi:10.3390/w11051012
- 746 27. Li J, Huo R, Chen H, Zhao Y, and Zhao T (2021). Comparative Assessment and Future  
747 Prediction Using CMIP6 and CMIP5 for Annual Precipitation and Extreme  
748 Precipitation Simulation. *Front. Earth Sci.* 9:687976. doi: 10.3389/feart.2021.687976.
- 749 28. Marx A, Kumar R, Thober S, Rakovec O, Wanders N, Zink M, Wood E F, Pan M,  
750 Sheffield J, and Samaniego L (2018). Climate change alters low flows in Europe under  
751 global warming of 1.5, 2, and 3 °C. *Hydrol. Earth Syst. Sci.*, 22: 1017–1032
- 752 29. Ministry of Urban Development, Government of India, Kanpur Nagar Nigam and  
753 Administrative Staff College of India, 2016. City Sanitation Plan for Kanpur.
- 754 30. Namugizea J N, Jewitta G, Graham M (2018). Effects of land use and land cover  
755 changes on water quality in the uMngeni river catchment, South Africa. *Physics and*  
756 *Chemistry of the Earth* 105: 247–264.
- 757 31. Pascual-Benito M , Nadal-Sala D, Tobella M, Ballest E, García-Aljaro C, Sabat S,  
758 Sabater F, Martí E., Gracia C.A, Blanch A.R., Lucena F. (2020). Modelling the seasonal  
759 impacts of a wastewater treatment plant on water quality in a Mediterranean stream  
760 using microbial indicators. *Journal of Environmental Management* 261 (2020) 110220.



- 761 32. Permatasari P A, Setiawan Y, Khairiah R N and Effendi H (2017). The effect of land-  
762 use change on water quality: A case study in Ciliwung Watershed. IOP Conf. Ser.:  
763 Earth Environ. Sci. 54 012026
- 764 33. Rehana S and Mujumdar P P 2012. Climate change induced risk in water quality control  
765 670 problems. Journal of Hydrology 444-445 63-77.
- 766 34. Rosario-Ortiz FL, Snyder SA, Suffet IH (2007). Characterization of dissolved organic  
767 matter in drinking water sources impacted by multiple tributaries. Water Res 41:4115–  
768 28.
- 769 35. Santy, S., Mujumdar, P. P. and Bala, G., 2020. Potential Impacts of Climate and Land  
770 Use Change on the Water Quality of Ganga River around the Industrialized Kanpur  
771 Region. Scientific Reports, 10:9107.
- 772 36. Santy, S., Mujumdar, P. P. and Bala, G., 2022. Increased risk of water quality  
773 deterioration under climate change in Ganga River. Front. Water 4:971623. doi:  
774 10.3389/frwa.2022.971623
- 775 37. Shukla, S., Khire, M. V., and Godan, S. S. (2018). Effects of urbanization on surface  
776 and subsurface hydrologic variables of upper bhima river basin, Maharashtra, India.  
777 Model. Earth Syst. Environ. 4, 699–728. doi: 10.1007/s40808-018-0446-9
- 778 38. The Economic Times, 2021. UP targets industrialization to raise economic growth and  
779 lift incomes of poorer regions. [https://economictimes.indiatimes.com/industry/indl-](https://economictimes.indiatimes.com/industry/indl-goods/svs/construction/up-targets-industrialisation-to-raise-economic-growth-and-lift-incomes-of-poorer-regions/articleshow/87332486.cms?from=mdr)  
780 [goods/svs/construction/up-targets-industrialisation-to-raise-economic-growth-and-lift-](https://economictimes.indiatimes.com/industry/indl-goods/svs/construction/up-targets-industrialisation-to-raise-economic-growth-and-lift-incomes-of-poorer-regions/articleshow/87332486.cms?from=mdr)  
781 [incomes-of-poorer-regions/articleshow/87332486.cms?from=mdr](https://economictimes.indiatimes.com/industry/indl-goods/svs/construction/up-targets-industrialisation-to-raise-economic-growth-and-lift-incomes-of-poorer-regions/articleshow/87332486.cms?from=mdr).
- 782 39. THE TIMES OF INDIA, 14Jan2021. Kanpur will be first city to formulate river  
783 management plan. [https://timesofindia.indiatimes.com/city/kanpur/kanpur-will-be-](https://timesofindia.indiatimes.com/city/kanpur/kanpur-will-be-first-city-to-formulate-river-mgmt-plan/articleshow/80256831.cms)  
784 [first-city-to-formulate-river-mgmt-plan/articleshow/80256831.cms](https://timesofindia.indiatimes.com/city/kanpur/kanpur-will-be-first-city-to-formulate-river-mgmt-plan/articleshow/80256831.cms).
- 785 40. Unnao Nagar Palika Parishad, 2016. Final Report of City Sanitation Plan Unnao.
- 786 41. US Army Corps of Engineers Hydrologic Engineering Center 2000. Hydrologic  
787 Modeling System HEC-HMS Technical Reference Manual.
- 788 42. Uttar Pradesh Jal Nigam, Uttar Pradesh Pollution Control Board, National Mission for  
789 Clean Ganga, MoWR, RD & GR, Central Pollution Control Board, MoEF&CC (2016).  
790 Assessment of Pollution of Drains Carrying Sewage /Industrial Effluent Joining River  
791 Ganga and its Tributaries (Kali-East/Ramganga) between Haridwar (Down) to Kanpur  
792 (Down)"
- 793 43. Uttar Pradesh Pollution Control Board (2019). Action Plan for Restoration of Polluted  
794 stretch of River Ganga from district Kannauj to district Varanasi.



- 795 44. Whitehead, P. G. et al. Modelling impacts of climate change and socio-economic  
796 change on the Ganga, Brahmaputra, Meghna, Hooghly and Mahanadi river systems in  
797 India and Bangladesh. *Science of The Total Environment* 636, 1362–1372,  
798 <https://doi.org/10.1016/j.scitotenv.2018.04.362> (2018).
- 799 45. Whitehead, P. G. Biophysical Modelling of the Ganges, Brahmaputra, and Meghna  
800 Catchment. (ed. Nicholls, R., Hutton, C., Adger, W.Hanson, S., Rahman, M., Salehin,  
801 M.) *Ecosystem Services for Well-Being in Deltas* 249–262,  
802 <https://doi.org/10.1007/978-3-319-71093-8> (Palgrave Macmillan, Cham, 2018).
- 803 46. Whitehead, P. G. et al. Dynamic modeling of the Ganga river system: impacts of future  
804 climate and socio-economic change on flows and nitrogen fluxes in India and  
805 Bangladesh. *Environmental Science: Processes and Impacts*,  
806 <https://doi.org/10.1039/c4em00616j> (2015).
- 807 47. Whitehead P G et al., 2015. Impacts of climate change and socio-economic scenarios  
808 on flow and water quality of the Ganges, Brahmaputra and Meghna (GBM) river  
809 systems: low flow and flood statistics. *Environmental Science: Processes & Impacts*
- 810 48. Zhou, F., Xu, Y., Chen, Y., Xu, C.-Y., Gao, Y., & Du, J. (2013). Hydrological response  
811 to urbanization at different spatio-temporal scales simulated by coupling of CLUE-S  
812 and the SWAT model in the Yangtze River Delta region. *Journal of Hydrology*, 485,  
813 113-125
- 814 49. Zou M., Niu J., Kang S., Li X. & Lu H. (2017). The contribution of human agricultural  
815 activities to increasing evapotranspiration is significantly greater than climate change  
816 effect over Heihe agricultural region. *Scientific Reports* 7: 8805.
- 817
